# Supplementary material
Source: PubMed Central journal article supplement (PMC10368402)
Supplement: NIHMS1877145-supplement-Supplementary_Material.pdf [file NIHMS1877145-supplement-Supplementary_Material.pdf]

# Supporting Information

## Microfluidic Systems For Manufacturing of Microparticle-Based Drug Delivery Systems: Design, Construction and Operation

*Nihan Yonet-Tanyeri<sup>1</sup>, Maher Amer<sup>2</sup>, Stephen C. Balmert<sup>2</sup>, Emrullah Korkmaz<sup>2,3</sup>, Louis D. Falot Jr<sup>2,3,4,5</sup>, Steven R. Little<sup>1,3,5,6,7,8,\*</sup>*

<sup>1</sup>Department of Chemical Engineering, University of Pittsburgh, 940 Benedum Hall, 3700 O'Hara Street, Pittsburgh, Pennsylvania 15261, United States

<sup>2</sup>Department of Dermatology, University of Pittsburgh School of Medicine, W1150 Biomedical Science Tower, 200 Lothrop Street, Pittsburgh, Pennsylvania 15213, United States

<sup>3</sup>Department of Bioengineering, University of Pittsburgh, Pittsburgh, Pennsylvania 15261, United States

<sup>4</sup>Clinical and Translational Science Institute, University of Pittsburgh, Pittsburgh, Pennsylvania 15213, United States

<sup>5</sup>The McGowan Institute for Regenerative Medicine, University of Pittsburgh, Pittsburgh, Pennsylvania 15219, United States

<sup>6</sup>Department of Immunology, University of Pittsburgh, Pittsburgh, Pennsylvania 15213, United States

<sup>7</sup>Department of Ophthalmology, University of Pittsburgh, Pittsburgh, Pennsylvania 15213, United States

<sup>8</sup>Department of Pharmaceutical Sciences, University of Pittsburgh, Pittsburgh, Pennsylvania 15261, United States

\* Corresponding author: srlittle@pitt.edu

**Video SI 1:** 2% PLGA solution forms droplets in the dripping flow regime. Droplet generation parameters: continuous phase flow rate of 50  $\mu\text{L}/\text{min}$  and dispersed phase flow rate of 8  $\mu\text{L}/\text{min}$ .

**Video SI 2:** 2% PLGA solution forms jetting flow regime. Droplet generation parameters: continuous phase flow rate of 100  $\mu\text{L}/\text{min}$  and dispersed phase flow rate of 8  $\mu\text{L}/\text{min}$ .

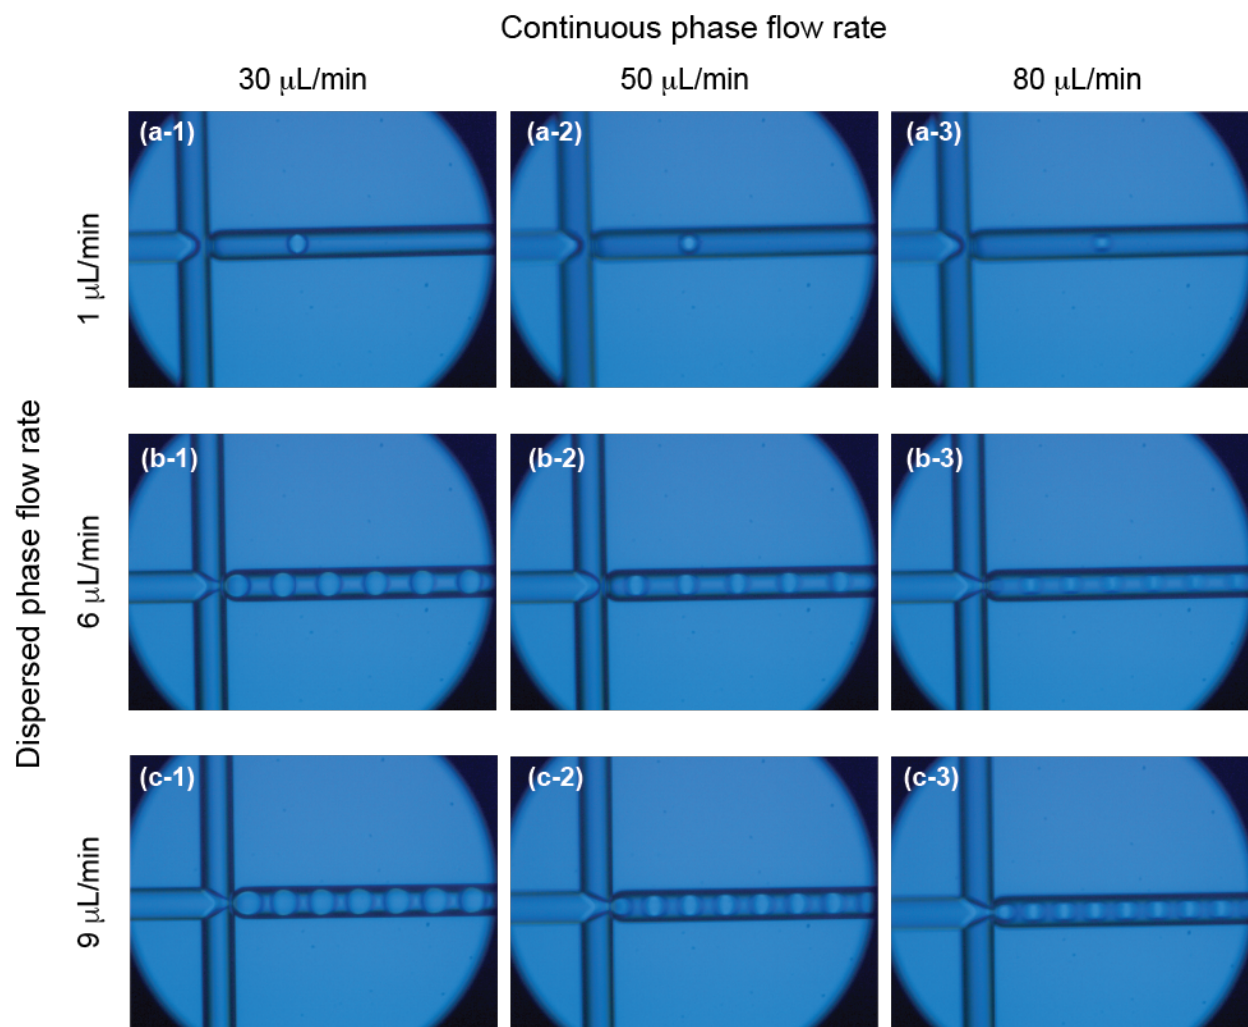

**Figure SI 1:** PLGA droplet size and frequency change as the flow rates changes. Droplet generation parameters: 2% PLGA solution with flow rates of 1  $\mu\text{L}/\text{min}$  (**a-1, a-2, a-3**), 6  $\mu\text{L}/\text{min}$  (**b-1, b-2, b-3**), or 9  $\mu\text{L}/\text{min}$  (**c-1, c-2, c-3**) and continuous phase flow rates of 30  $\mu\text{L}/\text{min}$  (**a-1, b-1, c-1**), 50  $\mu\text{L}/\text{min}$  (**a-2, b-2, c-2**), or 80  $\mu\text{L}/\text{min}$  (**a-3, b-3, c-3**). Width of the channel is 100  $\mu\text{m}$ .
